# Supplementary material for: Composite genome sequence of Bacillus clausii, a probiotic commercially available as Enterogermina®, and insights into its probiotic properties
Source: PubMed Central journal article supplement (PMC6937992; doi:10.1186/s12866-019-1680-7), 2019-12-30
Supplement: 12866_2019_1680_MOESM1_ESM.pdf [file 12866_2019_1680_MOESM1_ESM.pdf]

**Supplementary Information**

**Composite genome sequence of *Bacillus clausii*, a probiotic commercially available as Enterogermina®, and insights into its probiotic properties**

**Indu Khatri<sup>1,2\*</sup>, Gaurav Sharma<sup>1,3\*</sup>, Srikrishna Subramanian<sup>1#</sup>**

\* Equal Contribution

# Corresponding author

**Affiliations:**

<sup>1</sup> CSIR-Institute of Microbial Technology, Sector-39A, Chandigarh, India

<sup>2</sup> Leiden University Medical Center, Leiden, the Netherlands

<sup>3</sup> Institute of Bioinformatics and Applied Biotechnology, Bengaluru, Karnataka, India

**Contact Information:**

Srikrishna Subramanian  
Institute of Microbial Technology-CSIR  
Sector-39A, Chandigarh  
India-160036  
Email: [krishna@imtech.res.in](mailto:krishna@imtech.res.in)  
Telephone: +911726665483

**Figure S1: Mauve alignment of *B. clausii* ENTPro with its closer genomes. A) *B. clausii* ENTPro with *B. clausii* B106**

**B) *B. clausii* ENTPro with *B. clausii* KSM K-16.**

**A**

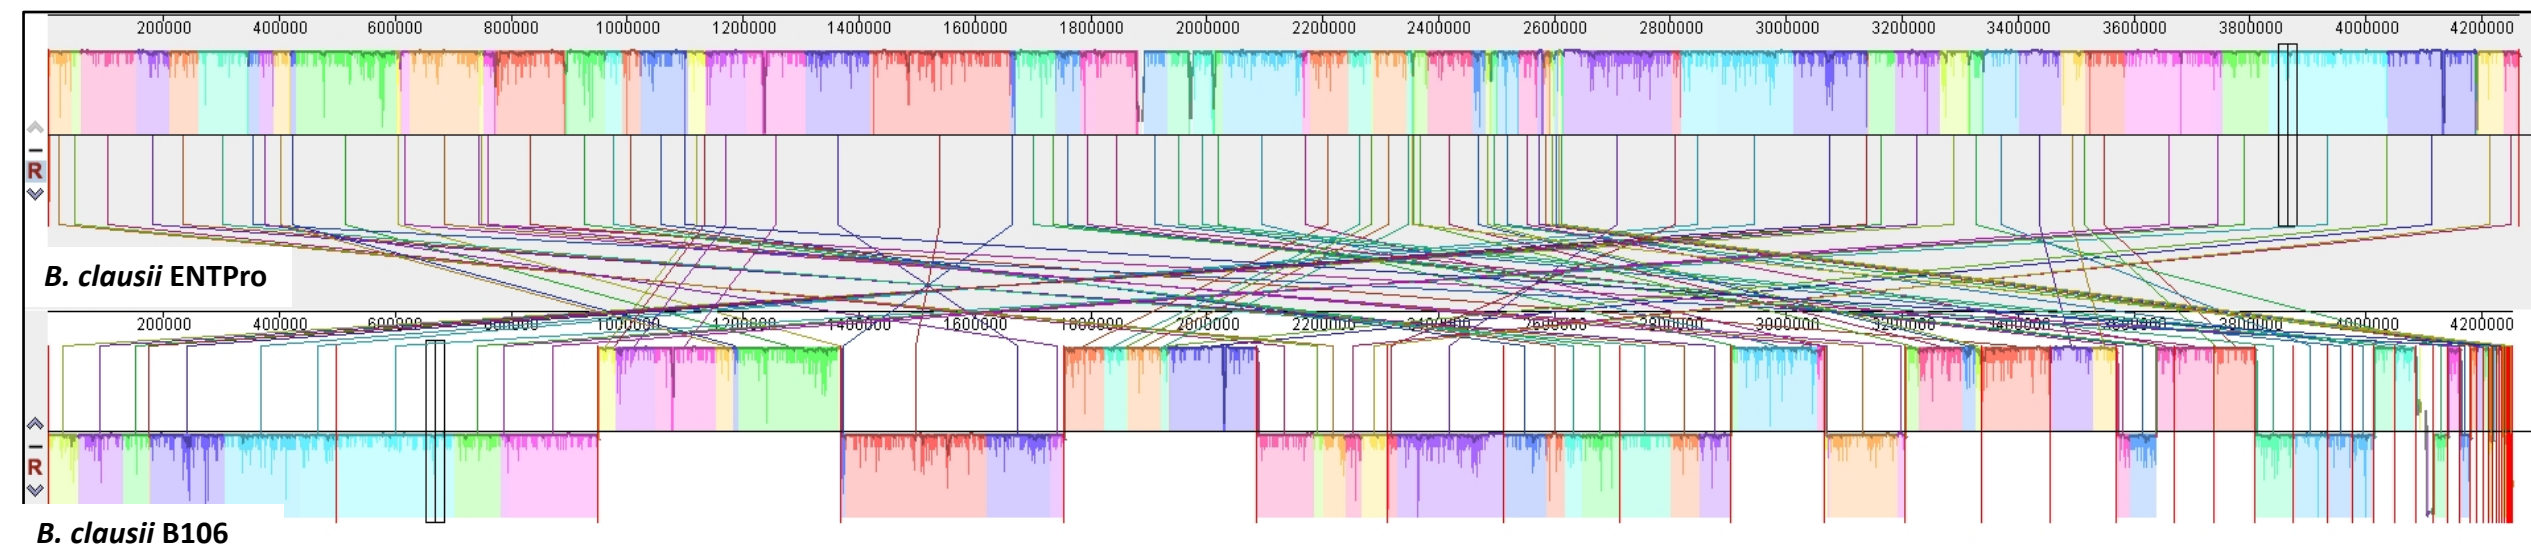

**B**

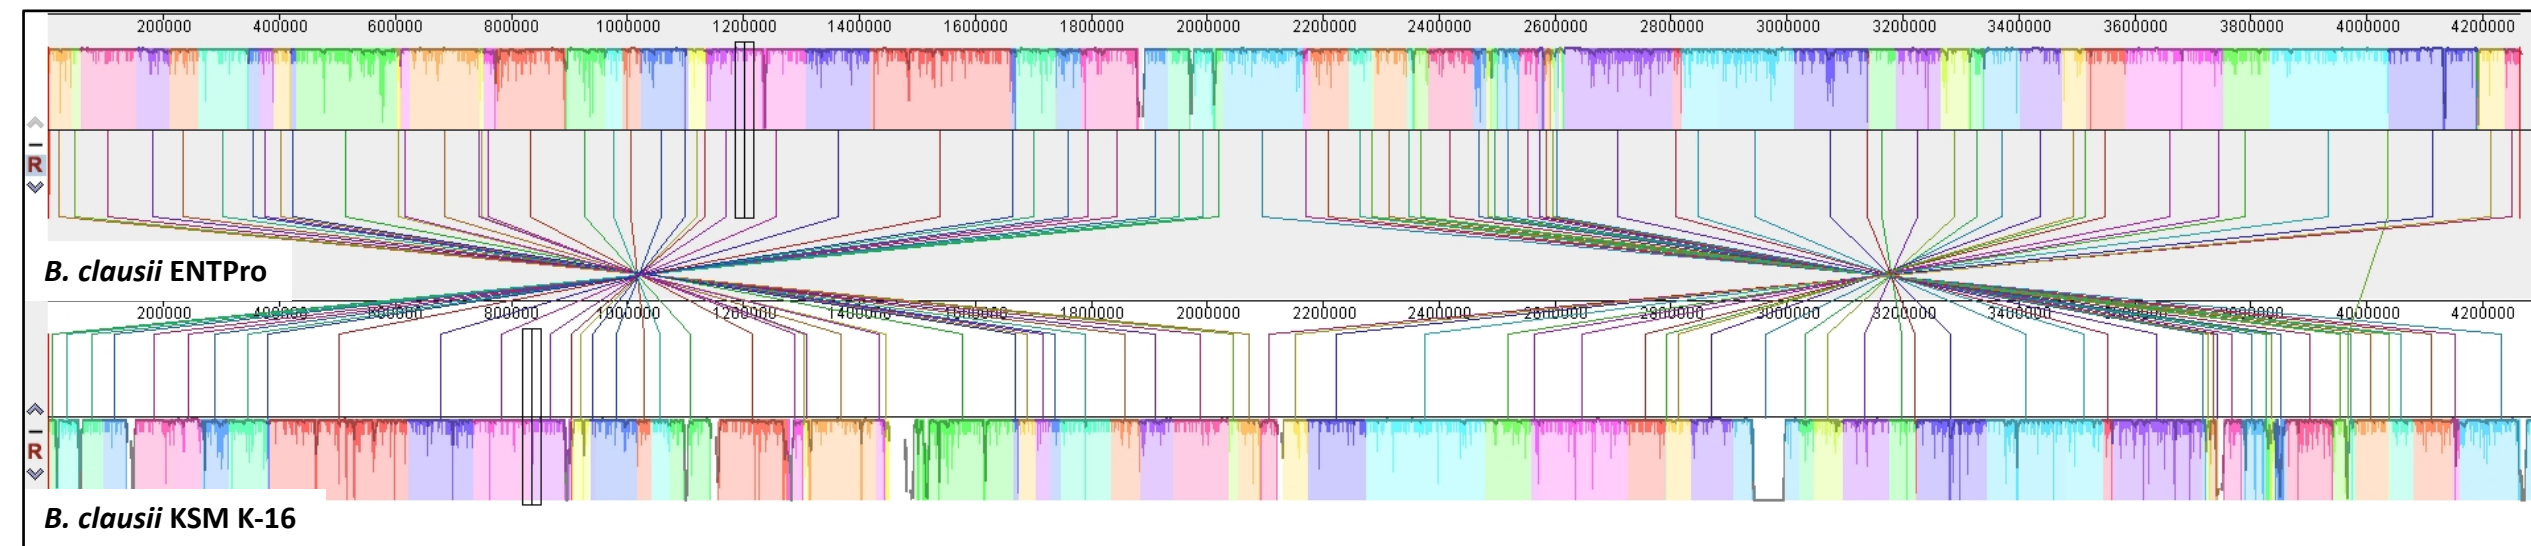

**Figure S2: The 16S rRNA alignment of operons identified in *B. clausii* ENTPro and its parental strains. The V-region are identified using V-Xtractor v.2.1 67. The V regions are marked by red bars and mutated positions are marked in pink color.**

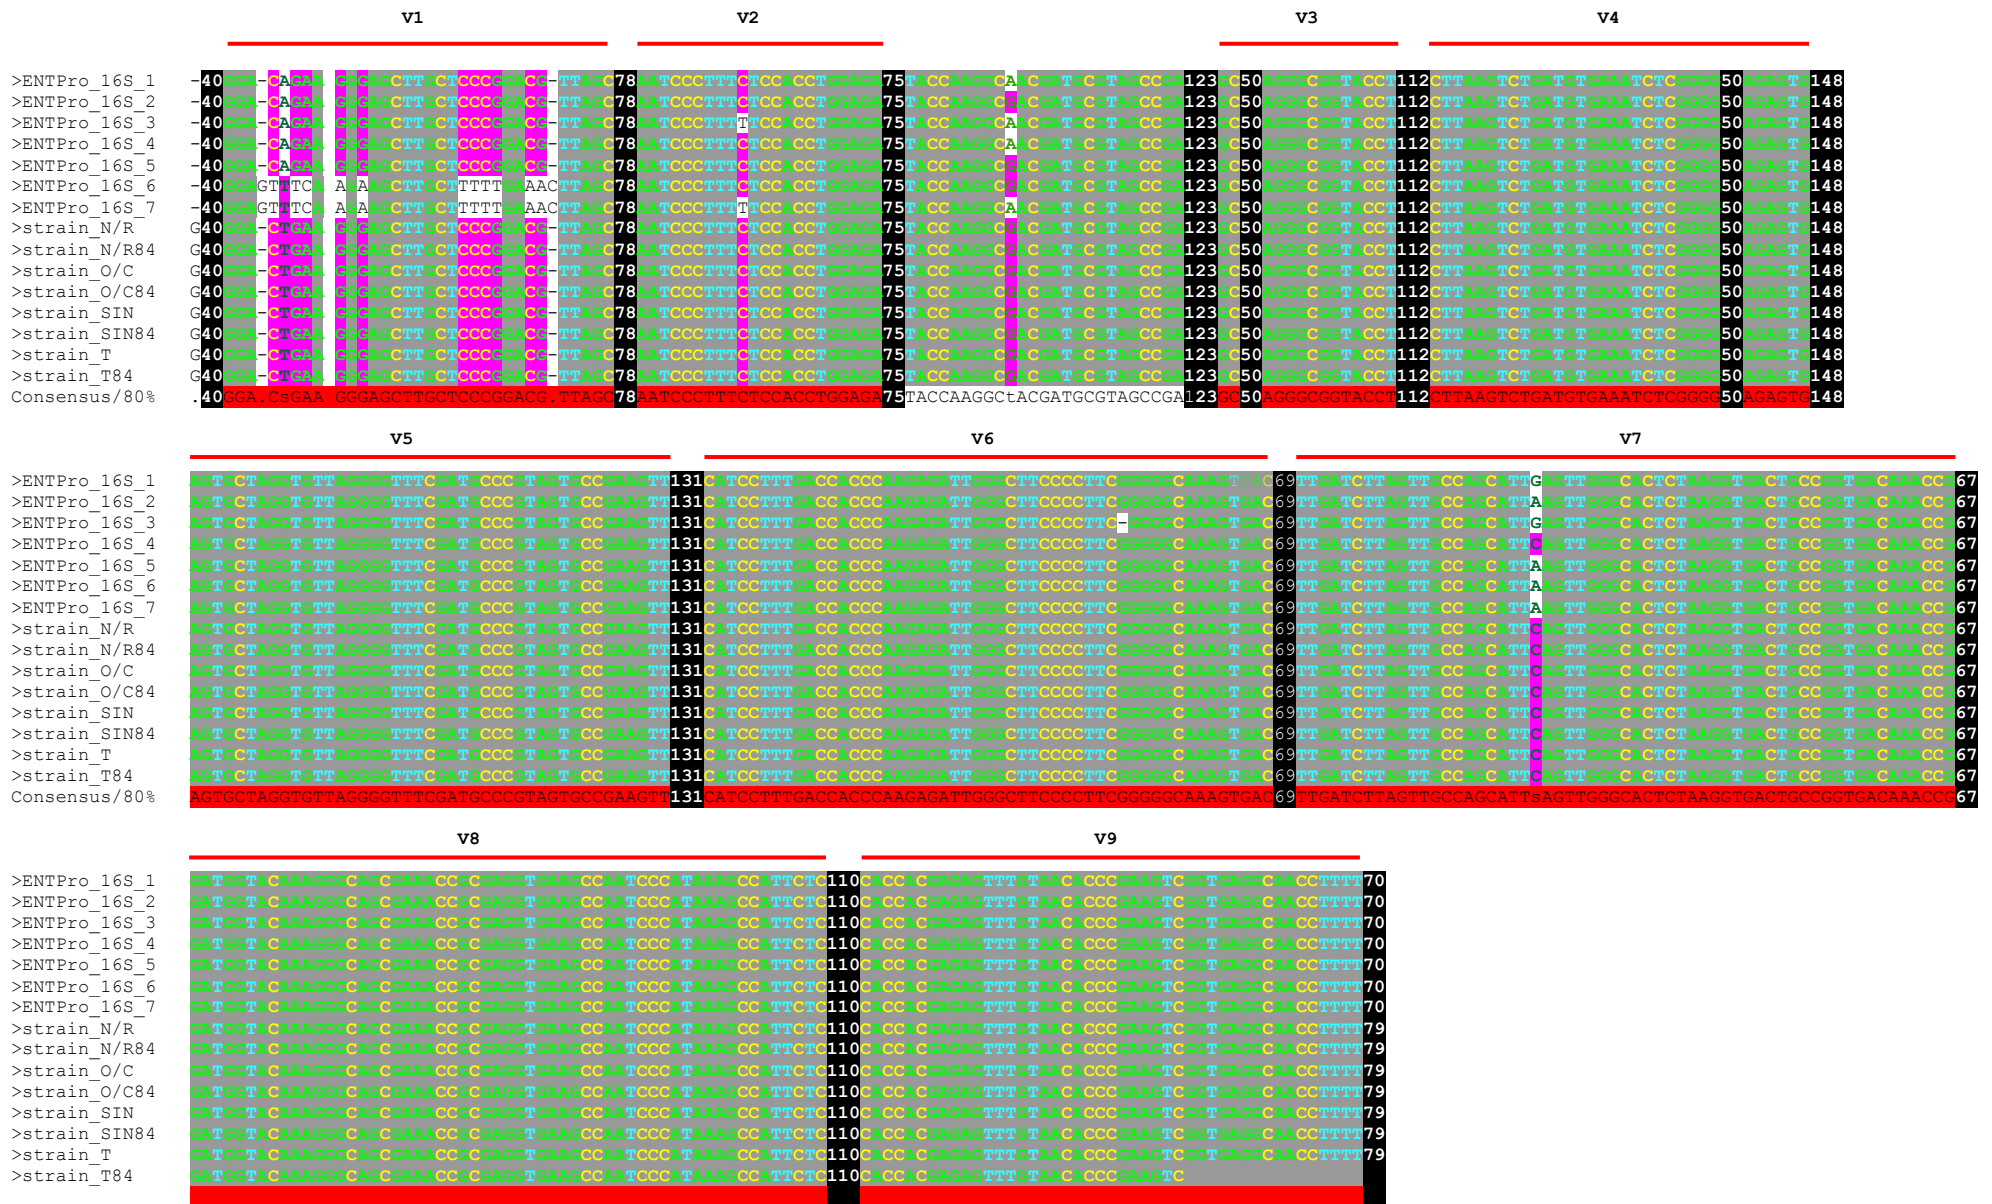

Figure S3: RpoB sequence alignment between *E. coli* and *B. clausii* genomes.

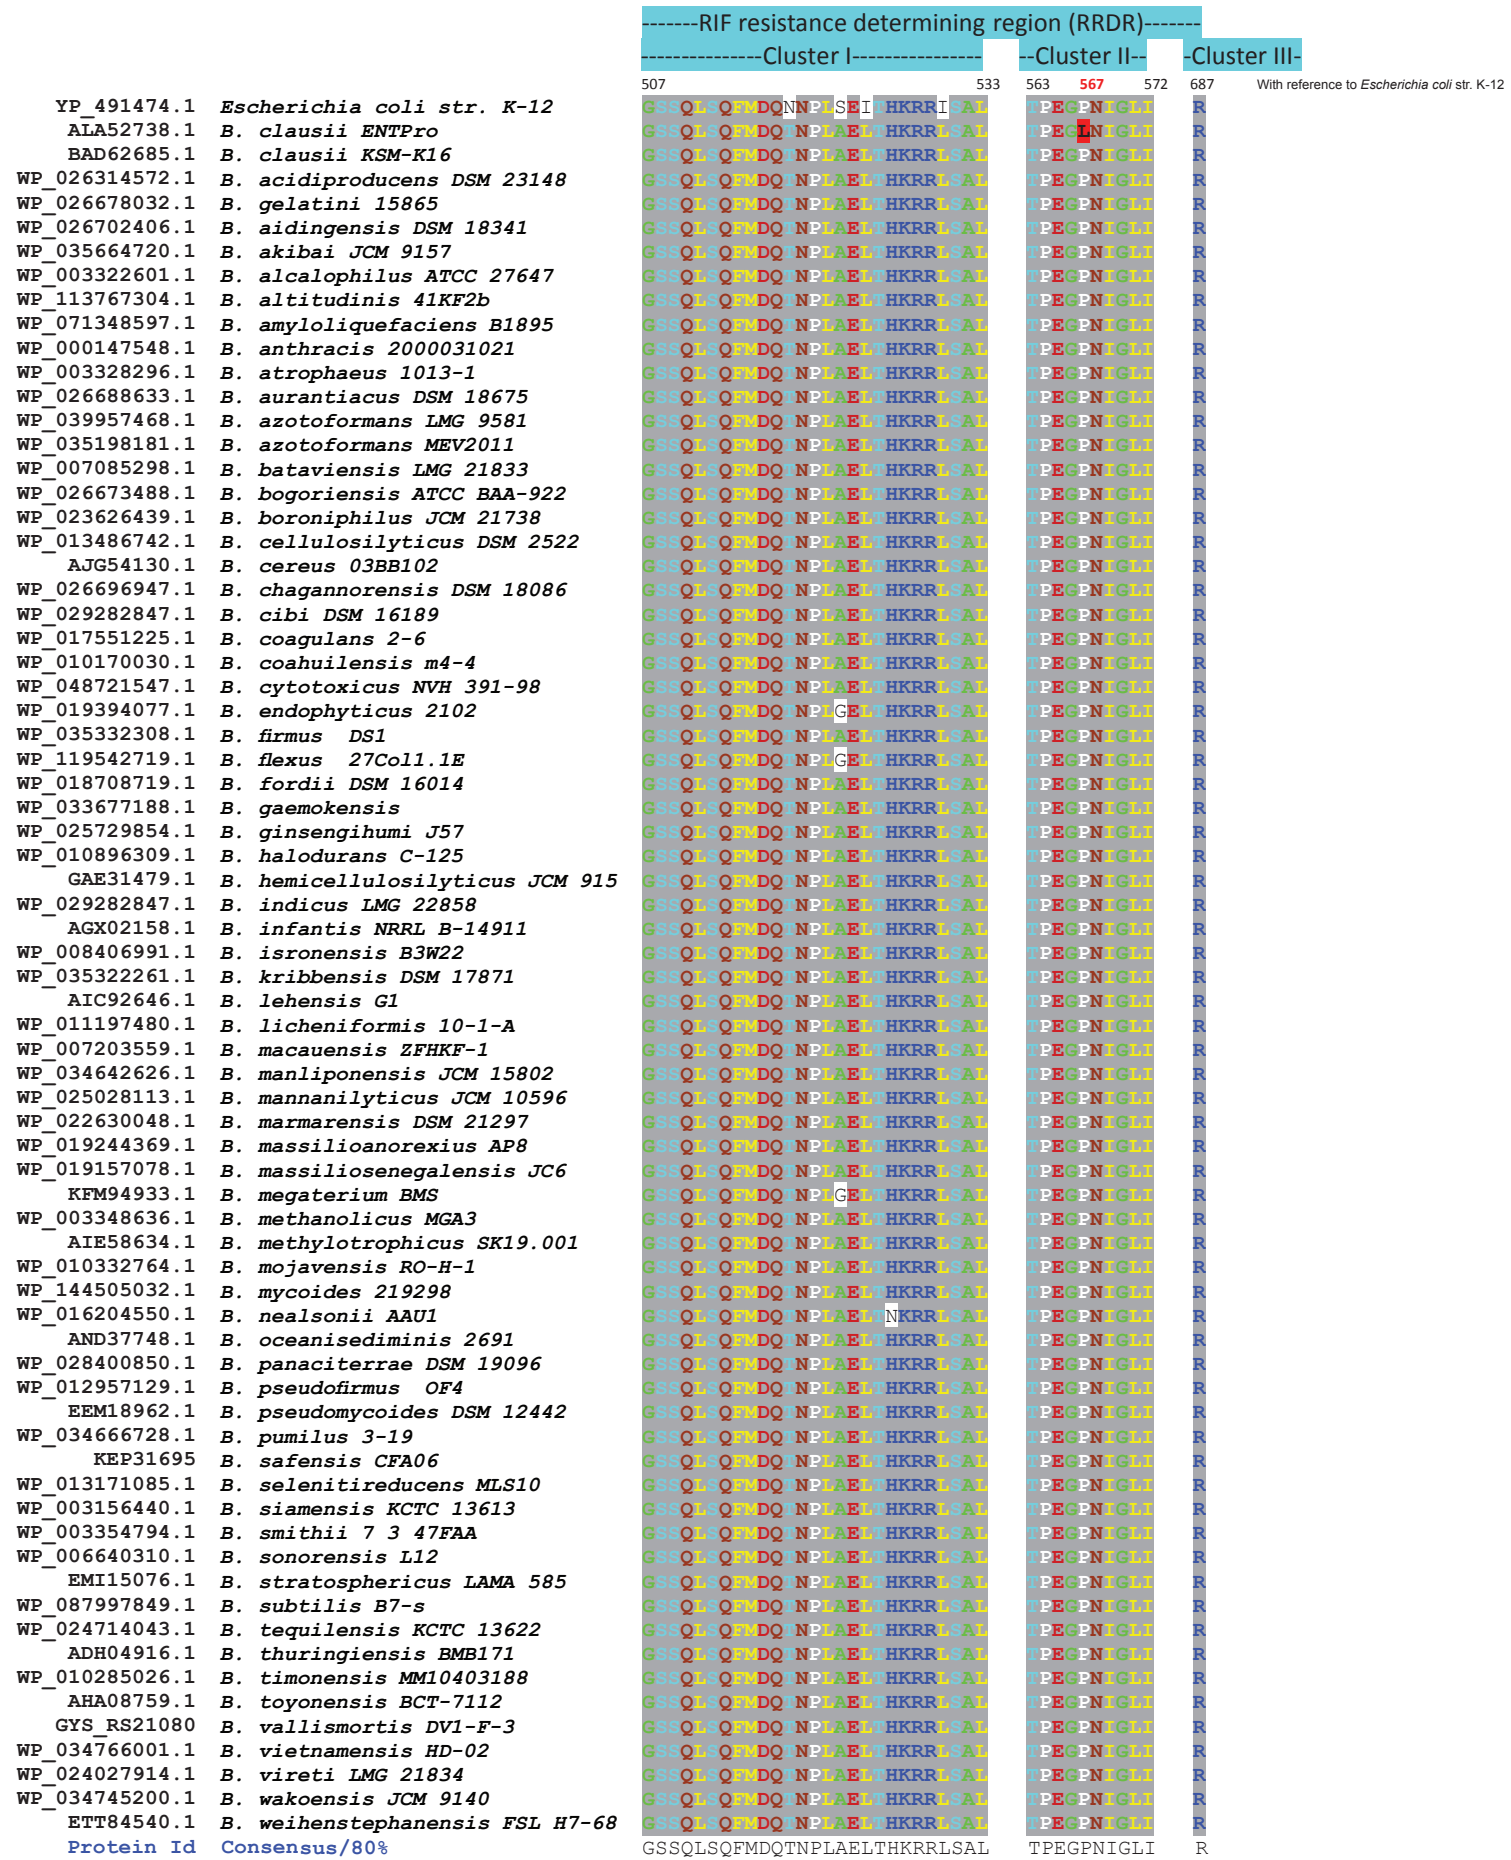

**Figure S4: The Streptomycin synthesis pathway components present in *B. clausii*.** Green box marks the presence of enzymes present in *B. clausii*.

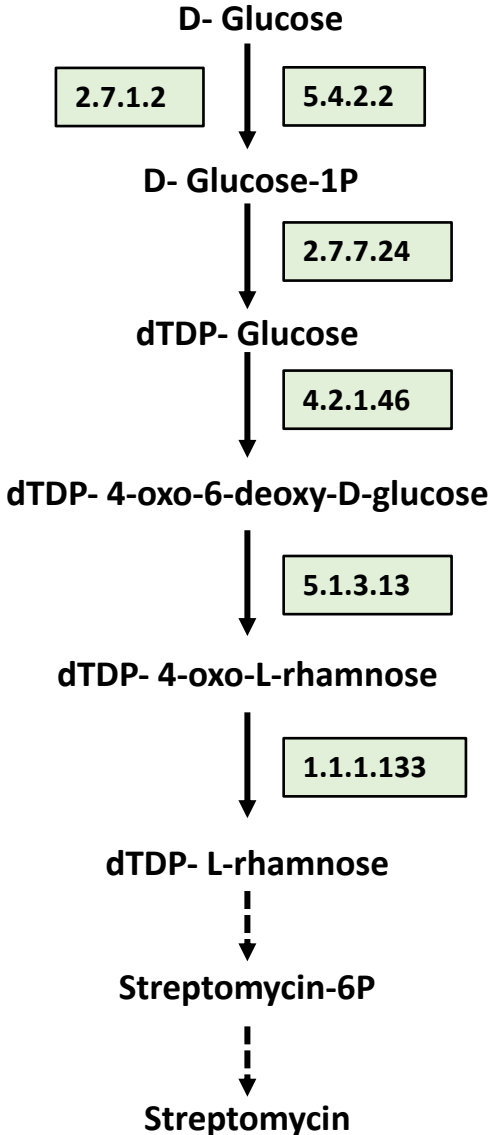

**Figure S5: The Vancomycin resistance pathway components present in *B. toyonensis* BCT-7112.**  
Green box marks the presence of gene whereas the not filled box marks the absence.

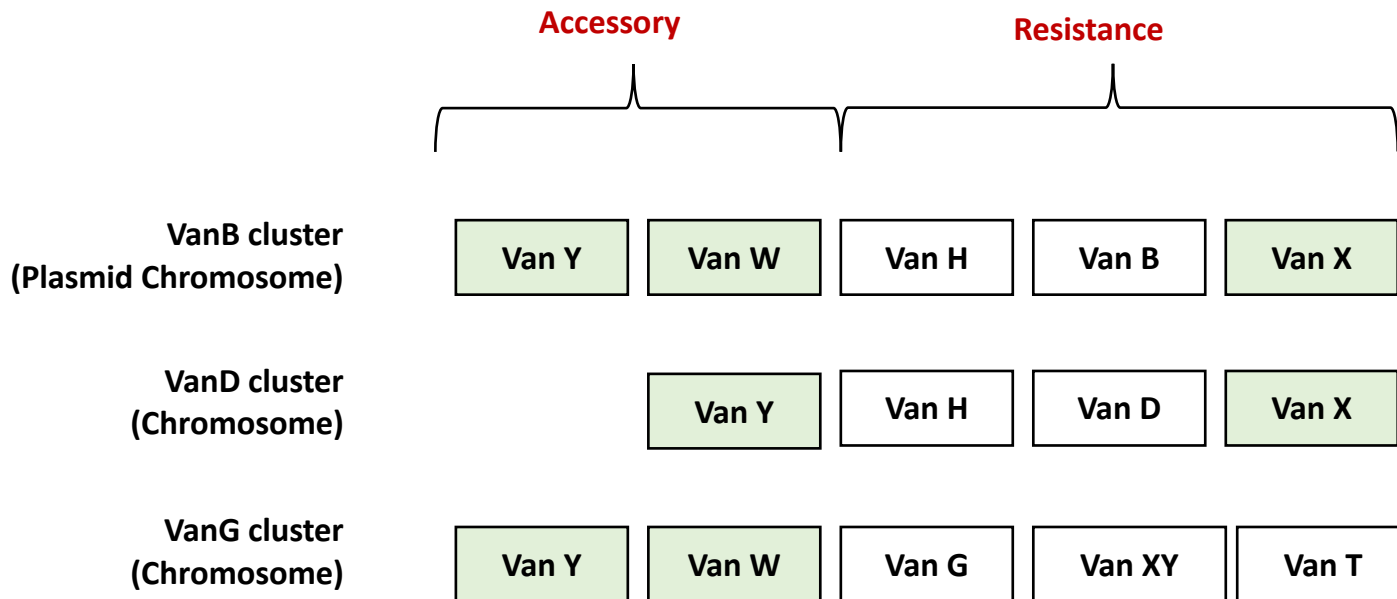

**Table S1: Genome Similarity of *B. clausii* ENTPro with other *B. clausii* genomes.** Formula I, II and III represents different methods used by GGDC to calculate the similarities.

| Query Genome<br>(GCA_000737305.2 ) | Reference Genome           | Assembly reference | Formula I | Formula II | Formula III |
|------------------------------------|----------------------------|--------------------|-----------|------------|-------------|
| <i>B. clausii</i> ENTPro           | <i>B. clausii</i> 7520-2   | GCA_002272085.1    | 85.6      | 62.4       | 84          |
| <i>B. clausii</i> ENTPro           | <i>B. clausii</i> 7522     | GCA_002272655.1    | 87.4      | 63.1       | 85.6        |
| <i>B. clausii</i> ENTPro           | <i>B. clausii</i> 7523-2   | GCA_002272645.1    | 76.9      | 62.8       | 76.7        |
| <i>B. clausii</i> ENTPro           | <i>B. clausii</i> 7529     | GCA_002272615.1    | 92.7      | 92.8       | 94.9        |
| <i>B. clausii</i> ENTPro           | <i>B. clausii</i> 7535-K   | GCA_002272605.1    | 85.8      | 62.7       | 84.2        |
| <i>B. clausii</i> ENTPro           | <i>B. clausii</i> 7537-T   | GCA_002272525.1    | 89.6      | 92.1       | 92.6        |
| <i>B. clausii</i> ENTPro           | <i>B. clausii</i> 7538     | GCA_002272545.1    | 93.3      | 93.5       | 95.4        |
| <i>B. clausii</i> ENTPro           | <i>B. clausii</i> 7539     | GCA_002272535.1    | 86.4      | 62.7       | 84.7        |
| <i>B. clausii</i> ENTPro           | <i>B. clausii</i> 7540-1   | GCA_002271585.1    | 87        | 63.4       | 85.3        |
| <i>B. clausii</i> ENTPro           | <i>B. clausii</i> 7540-2   | GCA_002271575.1    | 95.5      | 93.1       | 96.9        |
| <i>B. clausii</i> ENTPro           | <i>B. clausii</i> 7541     | GCA_002271555.1    | 94.5      | 92.4       | 96.1        |
| <i>B. clausii</i> ENTPro           | <i>B. clausii</i> 7543     | GCA_002272505.1    | 86.9      | 63.4       | 85.3        |
| <i>B. clausii</i> ENTPro           | <i>B. clausii</i> 7547-G   | GCA_002272445.1    | 93.5      | 93.4       | 95.5        |
| <i>B. clausii</i> ENTPro           | <i>B. clausii</i> 7894-1   | GCA_002271695.1    | 86.7      | 63.4       | 85.1        |
| <i>B. clausii</i> ENTPro           | <i>B. clausii</i> AKU0647  | GCA_001598215.1    | 75.9      | 50.7       | 72.4        |
| <i>B. clausii</i> ENTPro           | <i>B. clausii</i> B106     | GCA_002266625.1    | 99.9      | 99.8       | 100         |
| <i>B. clausii</i> ENTPro           | <i>B. clausii</i> DSM-8716 | GCA_002250115.1    | 86.2      | 62.6       | 84.5        |
| <i>B. clausii</i> ENTPro           | <i>B. clausii</i> KSM-K16  | GCA_000009825.1    | 95.2      | 94.3       | 96.8        |
| <i>B. clausii</i> ENTPro           | <i>B. clausii</i> UBBC-07  | GCA_000981315.1    | 93.1      | 92         | 95.1        |

**Table S2: Distribution of proteins involved in probiotic properties in *B. clausii* ENTPro genome.**

|                                        | <b>Probiotic nature</b>     | <b>Accession Numbers</b> | <b>Domain-tag</b> | <b>Domains-identified</b> | <b>Domain-wise E value (hmmscan)</b> |
|----------------------------------------|-----------------------------|--------------------------|-------------------|---------------------------|--------------------------------------|
| <b>Environmental stress resistance</b> | Chaperonins GroEL           | ALA51946                 | PF00118           | Cpn60_TCP1                | 4.30E-104                            |
|                                        | Chaperonins GroES           | ALA51947                 | PF00166           | Cpn10                     | 7.30E-37                             |
|                                        | Clp protease                | ALA52850                 | PF00574           | CLP_protease              | 2.90E-79                             |
|                                        |                             | ALA54099                 | PF00574           | CLP_protease              | 3.40E-89                             |
|                                        |                             | ALA54894                 | PF00574           | CLP_protease              | 5.10E-36                             |
|                                        | Cold shock protein          | ALA52002                 | PF00313           | CSD                       | 1.10E-31                             |
|                                        |                             | ALA54053                 | PF00313           | CSD                       | 3.50E-33                             |
|                                        | Heat shock protein          | ALA52772                 | PF01430           | HSP33                     | 4.20E-90                             |
|                                        | Heat resistance             | ALA51177                 | PF01025           | GrpE                      | 6.20E-52                             |
|                                        | Hyperosmotic stress         | ALA51175                 | PF00226           | DnaJ                      | 4.40E-25                             |
|                                        | Oxidative stress            | ALA51081                 | PF01625           | PMSR                      | 4.20E-60                             |
|                                        | Universal Stress            | ALA54975                 | PF01625           | PMSR                      | 2.50E-60                             |
|                                        |                             | ALA52046                 | PF00582           | Usp                       | 1.20E-07                             |
|                                        |                             | ALA52818                 | PF00582           | Usp                       | 4.20E-06                             |
| ALA53908                               | PF00582                     | Usp                      | 3.20E-32          |                           |                                      |
| <b>Adhesion to gut mucosa</b>          | Mucus binding protein       | ALA51653                 | PF00746           | Gram_pos_anchor           | 9.10E-05                             |
|                                        | Collagen binding protein    | ALA53512                 | PF05737           | Collagen_bind             | 1.60E-30                             |
|                                        | Fibronectin binding protein | ALA54776                 | PF05833           | FbpA                      | 1.10E-166                            |
|                                        | Sortase                     | ALA51654                 | PF04203           | Sortase                   | 4.50E-24                             |
|                                        |                             | ALA51828                 | PF04203           | Sortase                   | 1.00E-26                             |
|                                        |                             | ALA53120                 | PF04203           | Sortase                   | 4.50E-28                             |
|                                        |                             | ALA53513                 | PF04203           | Sortase                   | 5.60E-26                             |
|                                        |                             | ALA53680                 | PF04203           | Sortase                   | 1.50E-22                             |
|                                        | Flagellin                   | ALA53337                 | PF00669           | Flagellin_N               | 1.90E-40                             |
|                                        |                             | ALA54045                 | PF00669           | Flagellin_N               | 4.90E-16                             |
| Triosephosphate isomerase              | ALA54107                    | PF00121                  | TIM               | 3.00E-95                  |                                      |



|                       |                                   |          |         |               |           |
|-----------------------|-----------------------------------|----------|---------|---------------|-----------|
| <b>Bile tolerance</b> | Ornithine decarboxylase           | ALA52835 | PF01276 | OKR_DC_1      | 1.60E-60  |
|                       |                                   | ALA54693 | PF01276 | OKR_DC_1      | 1.90E-101 |
|                       | Sodium bile acid symporter family | ALA51223 | PF01758 | SBF           | 1.10E-14  |
|                       |                                   | ALA51591 | PF01758 | SBF           | 1.40E-41  |
|                       |                                   | ALA52219 | PF01758 | SBF           | 3.80E-25  |
| <b>Acid tolerance</b> | F0F1 ATP_synthase                 | ALA53170 | PF00119 | ATP-synt_A    | 3.20E-49  |
|                       |                                   | ALA53171 | PF00137 | ATP-synt_C    | 7.10E-14  |
|                       |                                   | ALA53172 | PF00430 | ATP-synt_B    | 3.10E-40  |
|                       |                                   | ALA53173 | PF00213 | OSCP          | 1.70E-49  |
|                       |                                   | ALA53174 | PF00006 | ATP-synt_ab   | 2.10E-73  |
|                       |                                   | ALA53175 | PF00231 | ATP-synt      | 1.20E-91  |
|                       |                                   | ALA53176 | PF00006 | ATP-synt_ab   | 1.70E-68  |
|                       |                                   | ALA53177 | PF02823 | ATP-synt DE N | 1.40E-25  |

**Table S3: Proteins and domains involved in conferring antibiotic resistance in *B. clausii* ENTPro.**

| Resistance to         | Accession Numbers | Domain-tag | Domains-identified | Domain-wise E value (hmmScan) | Homolog in KSM-K16 (% identity) |
|-----------------------|-------------------|------------|--------------------|-------------------------------|---------------------------------|
| Aminoglycosidase      | ALA51464          | PF01636    | APH                | 8.1E-19                       | ABC_RS07395 (97.31)             |
| Aminoglycosidase      | ALA51859          | PF01636    | APH                | 9.9E-25                       | ABC_RS05095 (100)               |
| Aminoglycosidase      | ALA51976          | PF04439    | Adenyl_transf      | 1.8E-117                      | ABC_RS04555 (99.65)             |
| Aminoglycosidase      | ALA52626          | PF07827    | KNTase_C           | 2E-62                         | ABC_RS01520 (96.09)             |
| Penicillin repressor  | ALA52627          | PF03965    | Penicillinase_R    | 1.2E-34                       | ABC_RS01515 (98.41)             |
| Penicillin regulatory | ALA52628          | PF05569    | Peptidase_M56      | 6.2E-57                       | ABC_RS01510 (94.35)             |
| Penicillin            | ALA52629          | PF13354    | Beta-lactamase2    | 8.4E-34                       | ABC_RS01505 (91.69)             |
| Aminoglycosidase      | ALA52671          | PF01636    | APH                | 6.6E-22                       | ABC_RS01175 (98.63)             |
| Rifampicin            | ALA52738          | PF00562    | RNA_pol_Rpb2_6     | 5E-167                        | ABC_RS00825 (100)               |
| Tetracycline          | ALA53309          | cd00881    | TetM_like          | 1.07E-131                     | ABC_RS19270 (98.92)             |
| Aminoglycosidase      | ALA53421          | PF04439    | Adenyl_transf      | 1.7E-124                      | ABC_RS18770 (97.23)             |
| Aminoglycosidase      | ALA53555          | PF01636    | APH                | 9.5E-21                       | ABC_RS18315 (97.8)              |
| Erythromycin          | ALA53582          | PF00398    | RrnaAD             | 1.7E-51                       | ABC_RS18170 (99.64)             |
| Aminoglycosidase      | ALA54163          | PF01636    | APH                | 2.5E-27                       | ABC_RS15455 (99.65)             |
| Aminoglycosidase      | ALA54297          | PF01636    | APH                | 2.1E-19                       | ABC_RS14455 (99.62)             |
| Chloramphenicol       | ALA55212          | PF00302    | CAT                | 3E-78                         | ABC_RS10335 (98.6)              |

**Table S4: Accession numbers of the genomes used to generate the phylogenies.**

| <b>Genome</b>                               | <b>GenBank assembly accession</b> |
|---------------------------------------------|-----------------------------------|
| <i>B. altitudinis</i> SGAir0031             | GCA_002443015.2                   |
| <i>B. amyloliquefaciens</i> B1895           | GCA_000696285.1                   |
| <i>B. amyloliquefaciens</i> H57             | GCA_001617995.1                   |
| <i>B. amyloliquefaciens</i> -DSM7           | GCA_000196735.1                   |
| <i>B. anthracis</i> str. Ames               | GCA_000007845.1                   |
| <i>B. anthracis</i> str. Sterne             | GCA_000008165.1                   |
| <i>B. atrophaeus</i> SRCM101359             | GCA_002173495.1                   |
| <i>B. beveridgei</i> MLTeJB                 | GCA_001721685.1                   |
| <i>B. bombysepticus</i> str. Wang           | GCA_000831065.1                   |
| <i>B. cellulolyticus</i> DSM2522            | GCA_000177235.2                   |
| <i>B. cereus</i> ATCC 14579                 | GCA_000007825.1                   |
| <i>B. coagulans</i> GB-I30                  | GCA_000756285.1                   |
| <i>B. coagulans</i> HM-08                   | GCA_000876545.1                   |
| <i>B. coagulans</i> S-lac                   | GCA_001039495.1                   |
| <i>B. coagulans</i> Unique IS-2             | GCA_001578455.1                   |
| <i>B. coagulans</i> DSM1                    | GCA_000832905.1                   |
| <i>B. cohnii</i> DSM-6307                   | GCA_001591425.1                   |
| <i>B. cytotoxicus</i> NVH 391-98            | GCA_000017425.1                   |
| <i>B. endophyticus (filamentous)</i> Hbe603 | GCA_000972245.3                   |
| <i>B. flexus</i> KLBMP 4941                 | GCA_002024265.1                   |
| <i>B. gibsonii</i> FJAT-10019               | GCA_001719185.1                   |
| <i>B. glycinifermentans</i> BGLY            | GCA_900093775.1                   |
| <i>B. gobiensis</i> FJAT-4402               | GCA_001278705.1                   |
| <i>B. halodurans</i> C-125                  | GCA_000011145.1                   |
| <i>B. horikoshii</i> 20a                    | GCA_002157855.1                   |
| <i>B. infantis</i> NRRL-B-14911             | GCA_000473245.1                   |
| <i>B. kochii</i> BDGP4                      | GCA_002276165.1                   |
| <i>B. krulwichiae</i> AM31D                 | GCA_002109385.1                   |
| <i>B. lehensis</i> G1                       | GCA_000706725.1                   |
| <i>B. licheniformis</i> ATCC 14580          | GCA_000011645.1                   |
| <i>B. megaterium</i> NBRC 15308             | GCA_000832985.1                   |
| <i>B. methanolicus</i> MGA3                 | GCA_000724485.1                   |
| <i>B. muralis</i> G25-68                    | GCA_001645685.2                   |
| <i>B. mycoides</i> ATCC 6462                | GCA_000832605.1                   |
| <i>B. oceanisediminis</i> 2691              | GCA_000294775.2                   |

|                                                     |                 |
|-----------------------------------------------------|-----------------|
| <i>B. paralicheniformis</i> BL09                    | GCA_000876525.1 |
| <i>B. paralicheniformis</i> 14DA11                  | GCA_002393225.1 |
| <i>B. paralicheniformis</i> ATCC 9945a              | GCA_000408885.1 |
| <i>B. pseudofirmus</i> OF4                          | GCA_000005825.2 |
| <i>B. pseudomycooides</i> DSM 12442                 | GCA_000161455.1 |
| <i>B. pumilus</i> RI06-95                           | GCA_001183525.1 |
| <i>B. pumilus</i> SH-B9                             | GCA_001578205.1 |
| <i>B. safensis</i> KCTC 12796BP                     | GCA_001895885.1 |
| <i>B. simplex</i> SH-B26                            | GCA_001578185.1 |
| <i>B. smithii</i> DSM4216                           | GCA_001050115.1 |
| <i>B. sonorensis</i> SRCM101395                     | GCA_002202015.1 |
| <i>B. subtilis</i> CU1                              | GCA_002093785.1 |
| <i>B. subtilis</i> KATMIRA1933                      | GCA_000691185.1 |
| <i>B. subtilis</i> TO-A-JPC                         | GCA_001037985.1 |
| <i>B. subtilis</i> 168                              | GCA_000009045.1 |
| <i>B. thuringiensis</i> YBT-1518                    | GCA_000497525.2 |
| <i>B. thuringiensis</i> serovar konkukian str.97-27 | GCA_000008505.1 |
| <i>B. toyonensis</i> BCT-7112                       | GCA_000496285.1 |
| <i>B. vallismortis</i> NBIF-001                     | GCA_002113805.1 |
| <i>B. velezensis</i> AS43.3                         | GCA_000319475.1 |
| <i>B. velezensis</i> SB1216                         | GCA_001634675.1 |
| <i>B. velezensis</i> SRCM10072                      | GCA_002201935.1 |
| <i>B. weihaiensis</i> Alg07                         | GCA_001889165.1 |
| <i>B. xiamenensis</i> VV3                           | GCA_001857925.1 |
| <i>B. kaustophilus</i> HTA426                       | GCA_000009785.1 |
| <i>L. innocua</i> Clip11262                         | GCA_000195795.1 |
| <i>L. ivanovii</i> WSLC3009                         | GCA_000565155.1 |
| <i>L. marthii</i> FSL S4-120                        | GCA_000183865.1 |
| <i>L. monocytogenes</i> EGD-e                       | GCA_000196035.1 |
| <i>L. seeligeri</i> serovar 1/2b str. SLCC3954      | GCA_000027145.1 |
| <i>L. welshimeri</i> NCTC11857                      | GCA_900187315.1 |
| <i>B. clausii</i> 7520-2                            | GCA_002272085.1 |
| <i>B. clausii</i> 7522                              | GCA_002272655.1 |
| <i>B. clausii</i> 7523-2                            | GCA_002272645.1 |
| <i>B. clausii</i> 7529                              | GCA_002272615.1 |
| <i>B. clausii</i> 7535-K                            | GCA_002272605.1 |
| <i>B. clausii</i> 7537-T                            | GCA_002272525.1 |
| <i>B. clausii</i> 7538                              | GCA_002272545.1 |
| <i>B. clausii</i> 7539                              | GCA_002272535.1 |

|                            |                 |
|----------------------------|-----------------|
| <i>B. clausii</i> 7540-1   | GCA_002271585.1 |
| <i>B. clausii</i> 7540-2   | GCA_002271575.1 |
| <i>B. clausii</i> 7541     | GCA_002271555.1 |
| <i>B. clausii</i> 7543     | GCA_002272505.1 |
| <i>B. clausii</i> 7547-G   | GCA_002272445.1 |
| <i>B. clausii</i> 7894-1   | GCA_002271695.1 |
| <i>B. clausii</i> AKU0647  | GCA_001598215.1 |
| <i>B. clausii</i> B106     | GCA_002266625.1 |
| <i>B. clausii</i> DSM-8716 | GCA_002250115.1 |
| <i>B. clausii</i> KSM-K16  | GCA_000009825.1 |
| <i>B. clausii</i> UBBC-07  | GCA_000981315.1 |
| <i>B. clausii</i> ENTPro   | GCA_000737305.2 |
